# Supplementary material for: Chronic comorbid conditions and asthma exacerbation occurrence in a general population sample
Source: Springer Nature journal article supplement (doi:10.1038/s41533-023-00350-x), 2023-08-11
Supplement: MOESM1 [file 41533_2023_350_MOESM1_ESM.pdf]

**Supplementary Table 1.** Operationalization of chronic comorbidity based on the National Health and Nutrition Examination Survey (NHANES) data

|                                | Chronic condition                            | NHANES data file name                       | NHANES data file   | Question(s)/item(s) used for analyses (response)                                                                                                                                                                                                                                                                                                                                                                                                                    |
|--------------------------------|----------------------------------------------|---------------------------------------------|--------------------|---------------------------------------------------------------------------------------------------------------------------------------------------------------------------------------------------------------------------------------------------------------------------------------------------------------------------------------------------------------------------------------------------------------------------------------------------------------------|
| <i>Systemic diseases</i>       | Obesity                                      | Body Measures (BMX_J)                       | Examination data   | Body Mass Index (kg/m2)                                                                                                                                                                                                                                                                                                                                                                                                                                             |
|                                | Rheumatoid arthritis                         | Medical Conditions (MCQ_J)                  | Questionnaire data | Doctor ever told that you had arthritis? (Yes)<br>Which type of arthritis was it?<br>• Osteoarthritis or degenerative arthritis<br>• Rheumatoid arthritis (Yes)<br>• Psoriatic arthritis<br>• Other                                                                                                                                                                                                                                                                 |
|                                | Gout                                         | Medical Conditions (MCQ_J)                  | Questionnaire data | Doctor ever told that you had gout? (Yes)                                                                                                                                                                                                                                                                                                                                                                                                                           |
| <i>Cardiovascular diseases</i> | Congestive heart failure                     | Medical Conditions (MCQ_J)                  | Questionnaire data | Doctor ever told you had congestive heart failure? (Yes)                                                                                                                                                                                                                                                                                                                                                                                                            |
|                                | Coronary heart disease                       | Medical Conditions (MCQ_J)                  | Questionnaire data | Doctor ever told you had coronary heart disease? (Yes)                                                                                                                                                                                                                                                                                                                                                                                                              |
|                                | Angina pectoris                              | Medical Conditions (MCQ_J)                  | Questionnaire data | Doctor ever told you had angina/angina pectoris? (Yes)                                                                                                                                                                                                                                                                                                                                                                                                              |
|                                | Heart attack                                 | Medical Conditions (MCQ_J)                  | Questionnaire data | Doctor ever told you had a heart attack? (Yes)                                                                                                                                                                                                                                                                                                                                                                                                                      |
|                                | Hypertension                                 | Blood Pressure & Cholesterol (BPQ_J)        | Questionnaire data | Now taking prescribed medicine for HBP? (Yes)                                                                                                                                                                                                                                                                                                                                                                                                                       |
|                                | Hypercholesterolemia                         | Blood Pressure & Cholesterol (BPQ_J)        | Questionnaire data | To lower your blood cholesterol, have you ever been told by a doctor or other health professional to take prescribed medicine? (Yes)                                                                                                                                                                                                                                                                                                                                |
|                                | Stroke                                       | Medical Conditions (MCQ_J)                  | Questionnaire data | Doctor ever told you had a stroke? (Yes)                                                                                                                                                                                                                                                                                                                                                                                                                            |
| <i>Organ diseases</i>          | Liver condition                              | Medical Conditions (MCQ_J)                  | Questionnaire data | Doctor ever told you had any liver condition? (Yes)                                                                                                                                                                                                                                                                                                                                                                                                                 |
|                                | Liver condition                              | Medical Conditions (MCQ_J)                  | Questionnaire data | Do you still have a liver condition? (Yes)                                                                                                                                                                                                                                                                                                                                                                                                                          |
|                                | Kidney failing                               | Kidney Conditions - Urology (KIQ_U_J)       | Questionnaire data | Doctor ever told you had weak/failing kidneys? (Yes)                                                                                                                                                                                                                                                                                                                                                                                                                |
|                                | Thyroid problem                              | Medical Conditions (MCQ_J)                  | Questionnaire data | Doctor ever told you had thyroid problem? (Yes)                                                                                                                                                                                                                                                                                                                                                                                                                     |
|                                | Diabetes                                     | Diabetes (DIQ_J)                            | Questionnaire data | Doctor ever told you have diabetes? (Yes)                                                                                                                                                                                                                                                                                                                                                                                                                           |
| <i>Psychiatric conditions</i>  | Depression                                   | Mental Health - Depression Screener (DPQ_J) | Questionnaire data | • Have little interest in doing things<br>• Feeling down, depressed, or hopeless<br>• Trouble sleeping or sleeping too much<br>• Feeling tired or having little energy<br>• Poor appetite or overeating<br>• Feeling bad about yourself<br>• Trouble concentrating on things<br>• Moving or speaking slowly or too fast<br>• Thought you would be better off dead<br>• Difficulty these problems have caused'<br>(sum score 5 to 10 is Yes, sum score 0 to 4 is No) |
| <i>Other</i>                   | Gastroesophageal Reflux Like Symptoms (GERS) | Prescription Medications (RXQ_RX_J)         | Questionnaire data | Reason for use (as reported by participant) data release variables: Heartburn (R12) and/or gastro-esophageal reflux disease (K21) and/or gastric ulcer (K25) and/or peptic ulcer and/or site unspecified (K27) and/or functional dyspepsia (K30) is Yes                                                                                                                                                                                                             |
|                                | Current soft drug use                        | Drug Use (DUQ_J)                            | Questionnaire data | How long has it been since you last smoked marijuana or hashish at least once a month for one year? (Days, Weeks, or Months is Yes)                                                                                                                                                                                                                                                                                                                                 |
|                                | Current hard drug use                        | Drug Use (DUQ_J)                            |                    | How long has it been since you last used cocaine, in any form? (Days, Weeks, or Months is Yes)                                                                                                                                                                                                                                                                                                                                                                      |
|                                |                                              | Drug Use (DUQ_J)                            |                    | How long has it been since you last used heroin? (Days, Weeks, or Months is Yes)                                                                                                                                                                                                                                                                                                                                                                                    |
|                                |                                              | Drug Use (DUQ_J)                            |                    | How long has it been since you last used methamphetamine? (Days, Weeks, or Months is Yes)                                                                                                                                                                                                                                                                                                                                                                           |
